# Supplementary material for: Intrinsic Flame-Retardant and Thermally Stable Epoxy Endowed by a Highly Efficient, Multifunctional Curing Agent
Source: PubMed Central journal article supplement (PMC5456980; doi:10.3390/ma9121008), 2016-12-12
Supplement: materials-09-01008-s001.pdf [file materials-09-01008-s001.pdf]

# Supplementary Materials: Intrinsic Flame-Retardant and Thermally Stable Epoxy Endowed by a Highly Efficient, Multifunctional Curing Agent

Chunlei Dong, Alvianto Wirasaputra, Qinqin Luo, Shumei Liu, Yanchao Yuan, Jianqing Zhao and Yi Fu

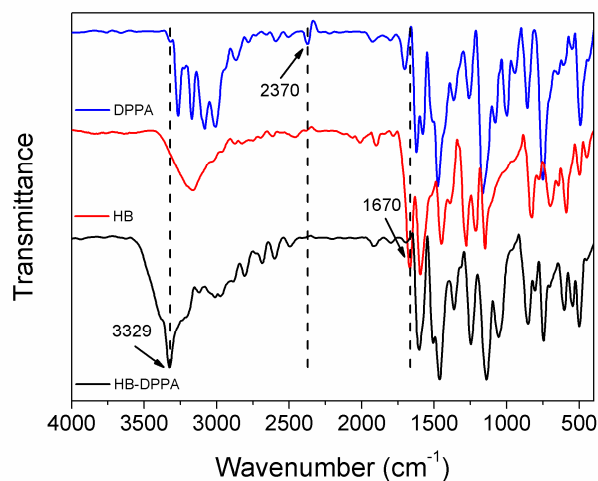

Figure S1. FTIR spectra of DPPA, HB, and HB-DPPA.

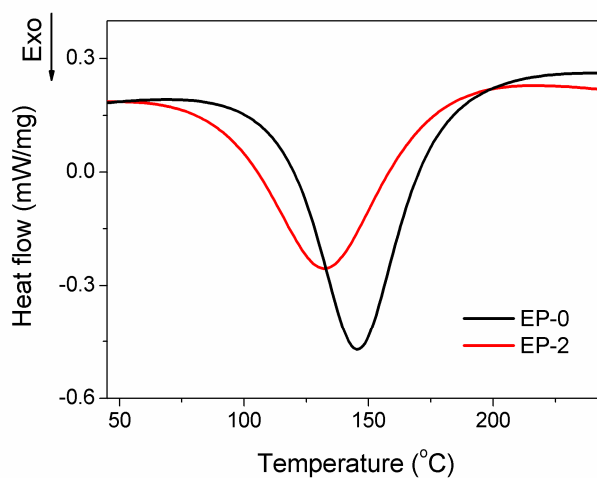

Figure S2. DSC thermograms of EP-0 and EP-2 at a heating rate of 5 °C/min.

Table S1. Curing parameters of EP-0 and EP-2.

| Sample ID | T <sub>0</sub> (°C) | T <sub>p</sub> (°C) | T <sub>e</sub> (°C) |
|-----------|---------------------|---------------------|---------------------|
| EP-0      | 69.1                | 145.4               | 238.4               |
| EP-2      | 54.5                | 132.1               | 215.7               |

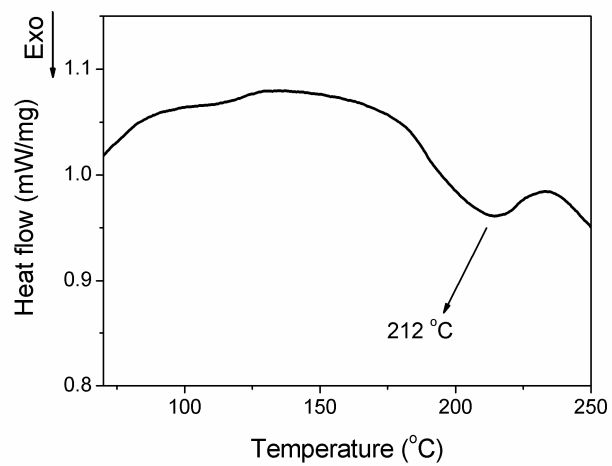

**Figure S3.** DSC thermogram of DGEBA/HB-DPPA at a heating rate of 5 °C/min.
